# Supplementary material for: MgAl layered double hydroxides with chloride and carbonate ions as interlayer anions for removal of arsenic and fluoride ions in water
Source: Royal Society of Chemistry journal article supplement (doi:10.1039/c4ra15160g), 2015-01-01
Supplement: c4ra15160g1.pdf [file c4ra15160g1.pdf]

# MgAl layered double hydroxides with chloride and carbonate ions as interlayer anions for removal of arsenic and fluoride ions in water

Pei-Pei Huang<sup>a, b</sup>, Chang-Yan Cao<sup>\*a</sup>, Fang Wei<sup>a</sup>, Yong-Bin Sun<sup>a</sup> and Wei-Guo Song<sup>\*a</sup>

<sup>a</sup> Beijing National Laboratory for Molecular Sciences (BNLMS) & Key Laboratory of Molecular Nanostructure and Nanotechnology, Institute of Chemistry, Chinese Academy of Sciences, Beijing, 100190, People's Republic of China

Tel and Fax: +86-10-62557908. E-mail: [cycas@iccas.ac.cn](mailto:cycas@iccas.ac.cn), [wsong@iccas.ac.cn](mailto:wsong@iccas.ac.cn)

<sup>b</sup> University of Chinese Academy of Sciences, Beijing 100049, People's Republic of China

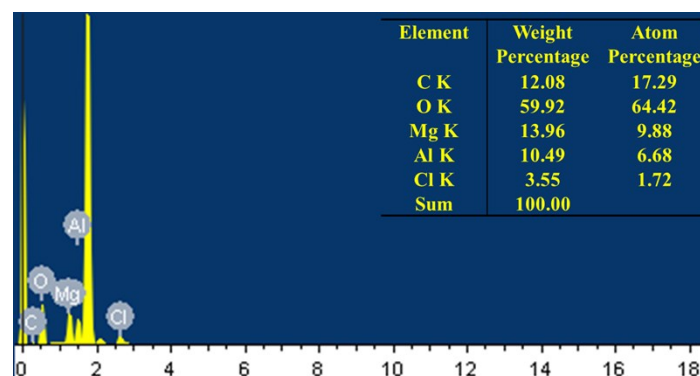

Fig. S1 EDS of the as-prepared MgAl-LDHs.

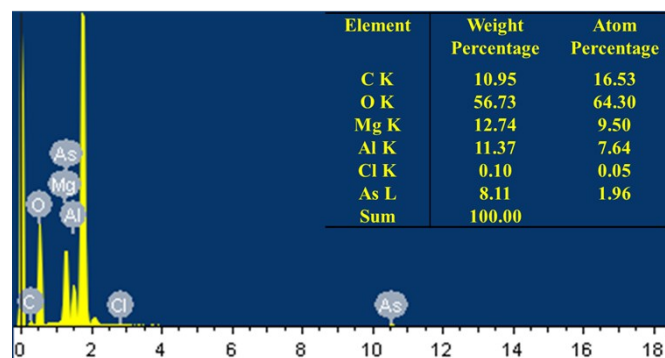

Fig. S2 EDS of MgAl-LDHs after As (V) adsorption, the initial concentrations of As (V) is 100 ppm.

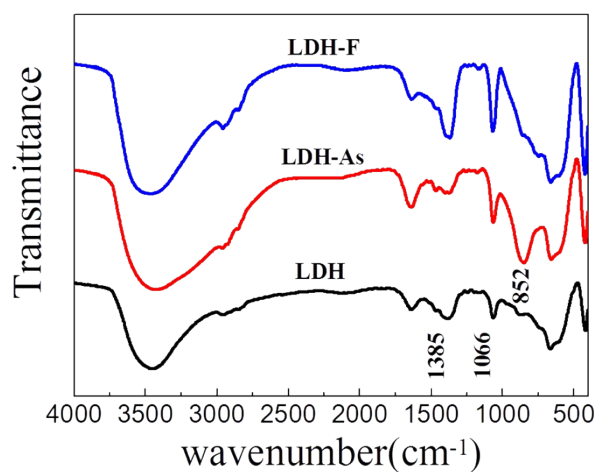

**Fig. S3** FTIR spectra of MgAl-LDHs before and after As (V)/F<sup>-</sup> adsorption, the initial concentrations of As (V) and F<sup>-</sup> both are 100 ppm.

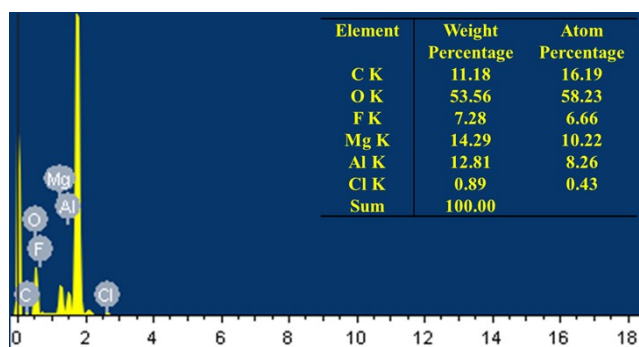

**Fig. S4** EDS of MgAl-LDHs after fluoride adsorption, the initial concentration of fluoride is 100 ppm.

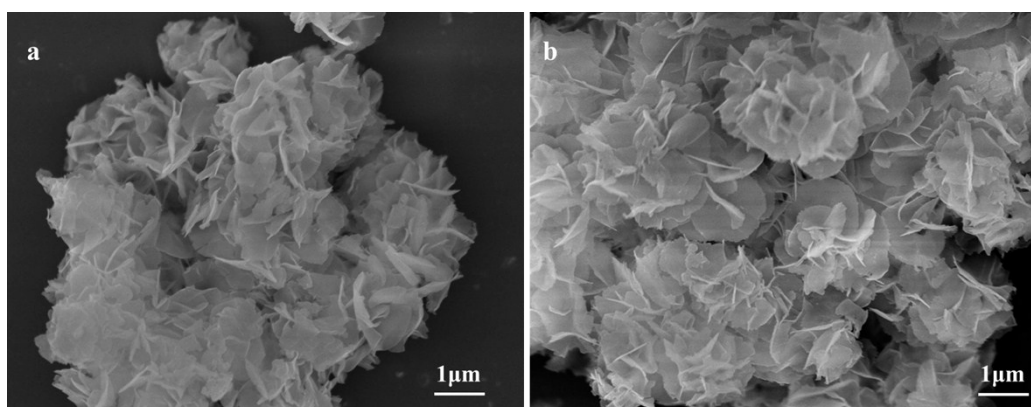

**Fig. S5** SEM images of MgAl-LDHs after adsorption of As (V) (a) and F<sup>-</sup> (b), the initial concentrations of As (V) and F<sup>-</sup> are both 100 ppm.

**Table S1** Summary of the Langmuir and Freundlich isotherms model parameters for the As (V)/F<sup>-</sup> uptake capacity on MgAl-LDHs.

| Sample name                              | Langmuir     |                           |                | Freundlich |      |                |
|------------------------------------------|--------------|---------------------------|----------------|------------|------|----------------|
|                                          | $q_m$ (mg/g) | $b$ (L mg <sup>-1</sup> ) | R <sup>2</sup> | $K_F$      | n    | R <sup>2</sup> |
| LDH-As                                   | 125.80       | 0.429                     | 0.983          | 44.28      | 0.24 | 0.763          |
| LDH-F                                    | 28.60        | 0.046                     | 0.843          | 4.74       | 0.34 | 0.988          |
| R <sup>2</sup> : correlation coefficient |              |                           |                |            |      |                |
